# Supplementary material for: Antidepressant outcomes of high-frequency repetitive transcranial magnetic stimulation (rTMS) with F8-coil and deep transcranial magnetic stimulation (DTMS) with H1-coil in major depression: a systematic review and meta-analysis
Source: Springer Nature journal article supplement (doi:10.1186/s12888-019-2106-7), 2019-05-07
Supplement: MOESM1 [file 16706412]

Gellersen, HM, Kedzior, KK. Antidepressant outcomes of high-frequency repetitive transcranial magnetic stimulation (rTMS) with F8-coil and deep transcranial magnetic stimulation (DTMS) with H1-coil in major depression: a systematic review and meta-analysis. BMC Psychiatry. 2019; doi: <https://doi.org/10.1186/s12888-019-2106-7>

Table of Contents

|                                                                                              |    |
|----------------------------------------------------------------------------------------------|----|
| <b>Studies in meta-analysis</b> .....                                                        | 2  |
| A. DTMS with H1-coil ( $k=8$ ) .....                                                         | 2  |
| B. rTMS with F8-coil ( $k=12$ ).....                                                         | 2  |
| <b>Figure S1. Depression severity: outlier analysis and one-study removed analysis</b> ..... | 3  |
| A. Outlier analysis .....                                                                    | 3  |
| B. One-study removed analysis .....                                                          | 3  |
| <b>Figure S2. Depression severity: subgroup analysis</b> .....                               | 5  |
| A. Study design (RCT vs. open-label).....                                                    | 5  |
| B. Therapy type (add-on to antidepressants vs. monotherapy) .....                            | 6  |
| <b>Figure S3. Depression severity: publication bias analysis</b> .....                       | 7  |
| <b>Figure S4. Response rates: subgroup analysis</b> .....                                    | 8  |
| A. Study design (RCT vs. open-label).....                                                    | 8  |
| B. Therapy type (add-on to antidepressants vs. monotherapy) .....                            | 9  |
| <b>Figure S5. Response rates: publication bias analysis</b> .....                            | 10 |
| <b>Figure S6. Remission rates: subgroup analysis</b> .....                                   | 11 |
| A. Study design (RCT vs. open-label).....                                                    | 11 |
| B. Therapy type (add-on to antidepressants vs. monotherapy) .....                            | 12 |
| <b>Figure S7. Remission rates: meta-regression analysis</b> .....                            | 13 |
| <b>Figure S8. Remission rates: publication bias analysis</b> .....                           | 14 |
| <b>Figure S9. Depression severity: subgroup analysis (H1-coil vs. F8-coil)</b> .....         | 15 |
| A. Open-label studies.....                                                                   | 15 |
| B. Add-on studies .....                                                                      | 16 |
| <b>Figure S10. Response rates: subgroup analysis (H1-coil vs. F8-coil)</b> .....             | 17 |
| A. Open-label studies.....                                                                   | 17 |
| B. Add-on studies .....                                                                      | 18 |
| <b>Figure S11. Remission rates: subgroup analysis (H1-coil vs. F8-coil)</b> .....            | 19 |
| A. Open-label studies.....                                                                   | 19 |
| B. Add-on studies .....                                                                      | 20 |
| <b>Table S1. Risk of bias assessment</b> .....                                               | 21 |
| <b>References</b> .....                                                                      | 22 |

## Studies in meta-analysis

$k=19$  with  $k=20$  independent subgroups

---

### A. DTMS with H1-coil ( $k=8$ )

Levkovitz et al., 2009 [1]

Rosenberg et al., 2010a [2]

Rosenberg et al., 2010b [3]

Isserles et al., 2011 [4]

Harel et al., 2014 [5]

Levkovitz et al., 2015 [6]

Rapinesi et al., 2015a [7]

Rapinesi et al., 2015b [8]

---

### B. rTMS with F8-coil ( $k=12$ )

George et al., 1997 [9]

Berman et al., 2000 [10]

Catafau et al., 2001 [11]

Garcia-Toro et al., 2001a [12]

Garcia-Toro et al., 2001b [13]

Boutros et al., 2002 [14]

Bajbouj et al., 2005 [15]

Yukimasa et al., 2006 [16]

Luborzewski et al., 2007 [17]

Bakim et al., 2012a [18] 80%

Bakim et al., 2012b [18] 110%

Chen et al., 2013 [19]

---

Figure S1. Depression severity: outlier analysis and one-study removed analysis

A. Outlier analysis

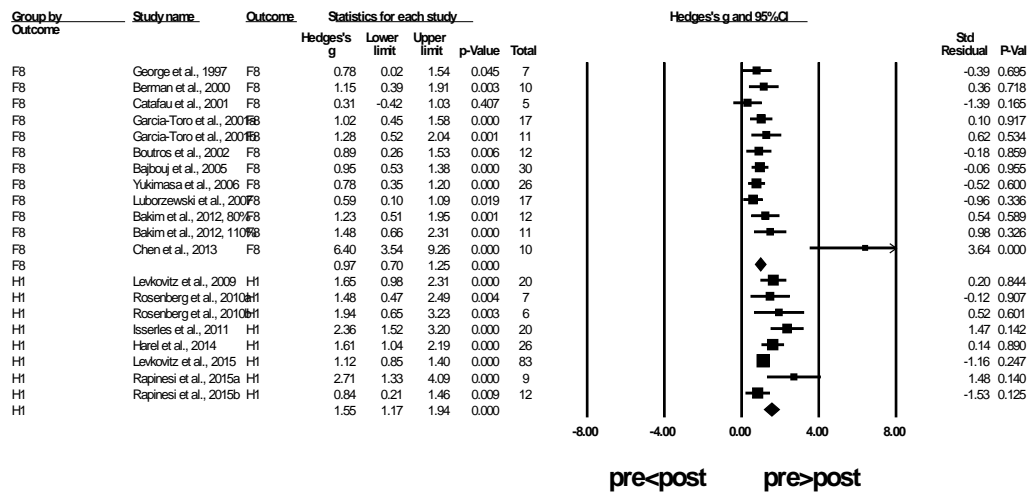

B. One-study removed analysis

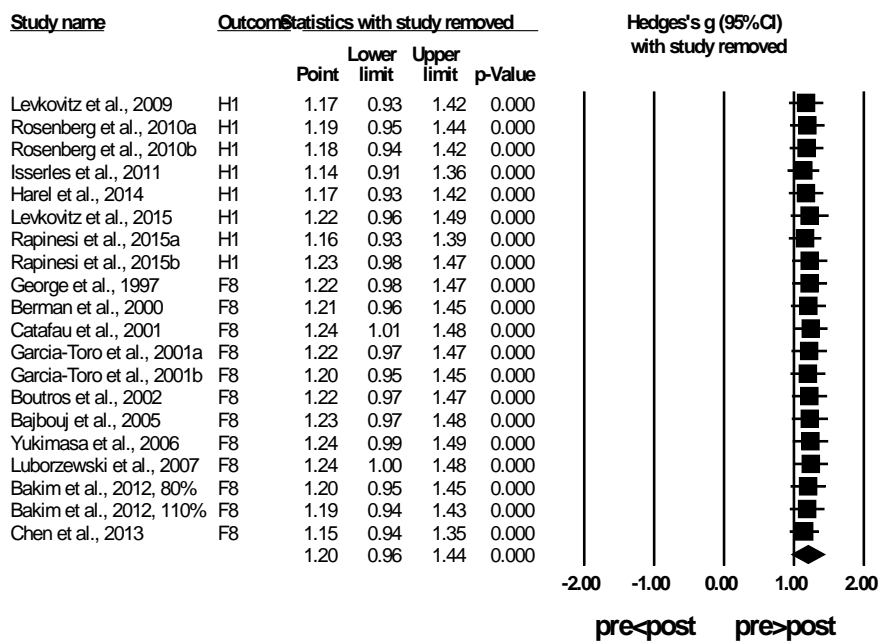

Note. Figures A-B are forest plots of the random-effects meta-analyses of the primary antidepressant outcome (depression severity at baseline (pre) – session 10 (post)) in all studies with either coil (F8-coil and H1-coil). Figure S1A shows the results of an outlier analysis. The effect size (Hedges'  $g$ ) in one study (Chen et al., 2013) was significantly ( $p < .01$ ) higher than all other effects in rTMS studies with F8-coil. The removal of this study did not change the interpretation of the pooled mean weighted effect that was 1.20 with and 1.15 without the study by Chen et al., 2013, respectively (Figure S1B).

Abbreviations: *CI*, 95% confidence interval; DTMS, deep transcranial magnetic stimulation; F8, figure-of-eight coil (rTMS); H1, H1-coil (DTMS); Hedges'  $g$  (effect size), standardised paired difference in means corrected for the sample size; rTMS, repetitive transcranial magnetic stimulation; Total, sample size per study.

**Figure S2. Depression severity: subgroup analysis**

A. Study design (RCT vs. open-label)

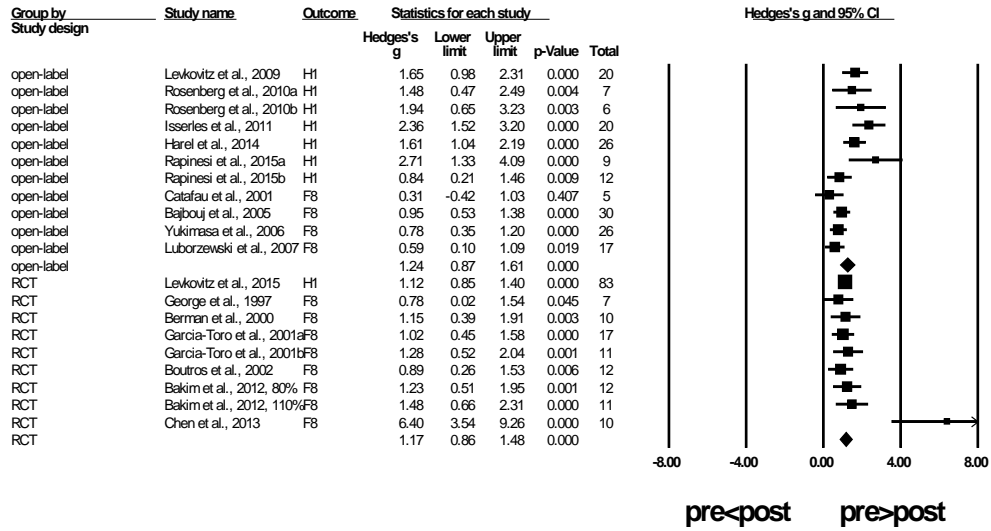

B. Therapy type (add-on to antidepressants vs. monotherapy)

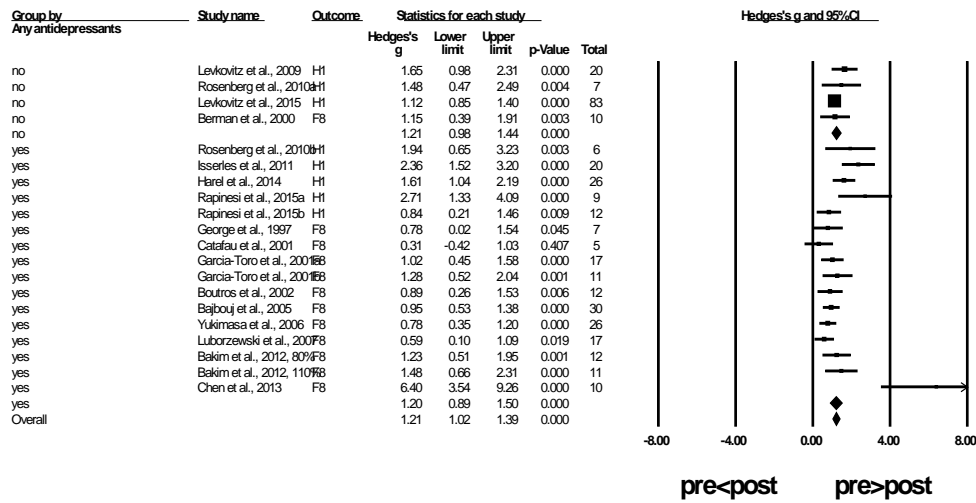

Note. Figures A-B are forest plots of mixed-effects meta-analyses comparing the antidepressant outcomes (depression severity) based on the study designs (RCTs vs. open-label, Figure A) or the therapy type (add-on to antidepressants vs. monotherapy, Figure B) in studies with either coil (F8-coil and H1-coil).

Abbreviations: *CI*, 95% confidence interval; DTMS, deep transcranial magnetic stimulation; F8, figure-of-eight coil (rTMS); H1, H1-coil (DTMS); Hedges' *g* (effect size), standardised paired difference in means corrected for the sample size; rTMS, repetitive transcranial magnetic stimulation; Total, sample size per study.

**Figure S3. Depression severity: publication bias analysis**

**Classic fail-safe N**

|                                                               |            |
|---------------------------------------------------------------|------------|
| Z-value for observed studies                                  | 16.34911   |
| P-value for observed studies                                  | 0.00000    |
| Alpha                                                         | 0.05000    |
| Tails                                                         | 2.00000    |
| Z for alpha                                                   | 1.95996    |
| Number of observed studies                                    | 20.00000   |
| Number of missing studies that would bring p-value to > alpha | 1372.00000 |

**Orwin's fail-safe N**

|                                                             |           |
|-------------------------------------------------------------|-----------|
| Hedges's g in observed studies                              | 1.10522   |
| Criterion for a 'trivial' hedges's g                        | 0.20000   |
| Mean hedges's g in missing studies                          | 0.10000   |
| Number missing studies needed to bring hedges's g under 0.2 | 182.00000 |

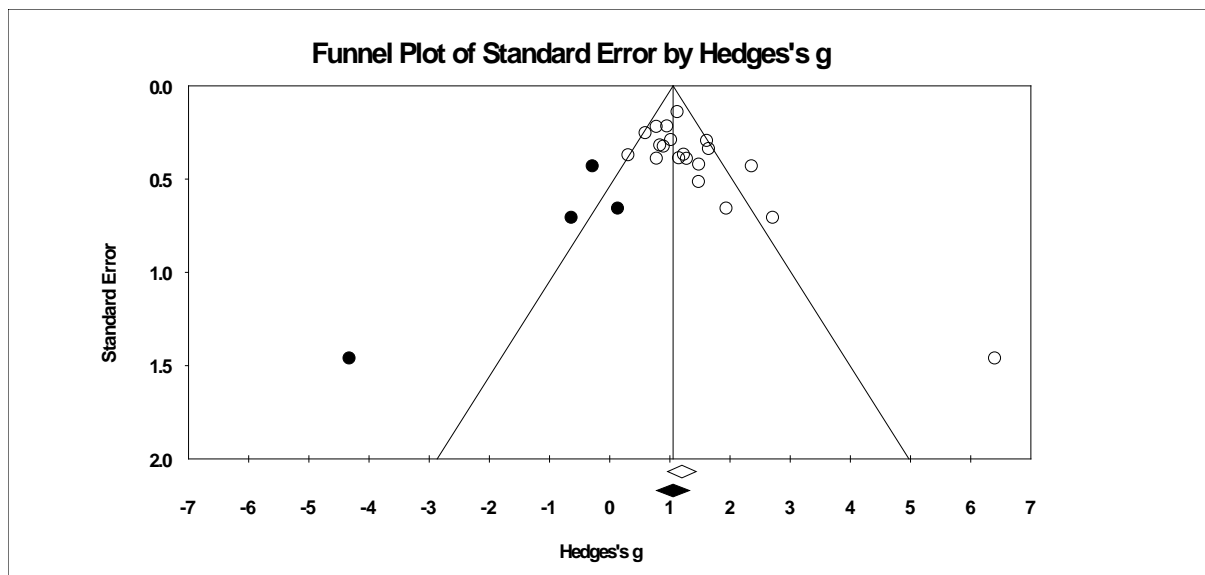

Note. The funnel plot shows a distribution of all effect sizes (the unfilled circles) around the pooled mean weighted effect of all studies (the unfilled diamond). Four studies theoretically missing from the analysis (the filled circles) are required to make the plot symmetric. The interpretation of the analysis including the missing studies (the filled diamond) is the same as without these studies (the unfilled diamond). If the missing studies indicate that publication bias occurred, such bias has no effect on the interpretation of the results of this analysis.

**Figure S4. Response rates: subgroup analysis**

A. Study design (RCT vs. open-label)

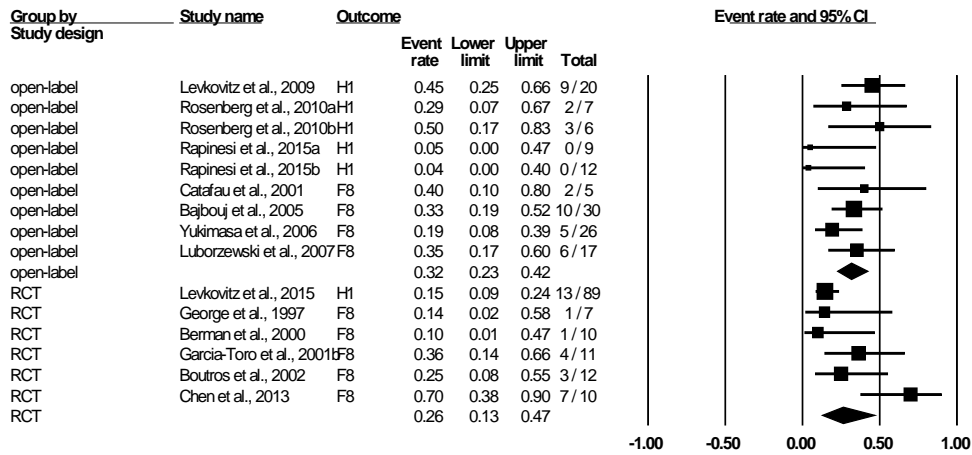



B. Therapy type (add-on to antidepressants vs. monotherapy)

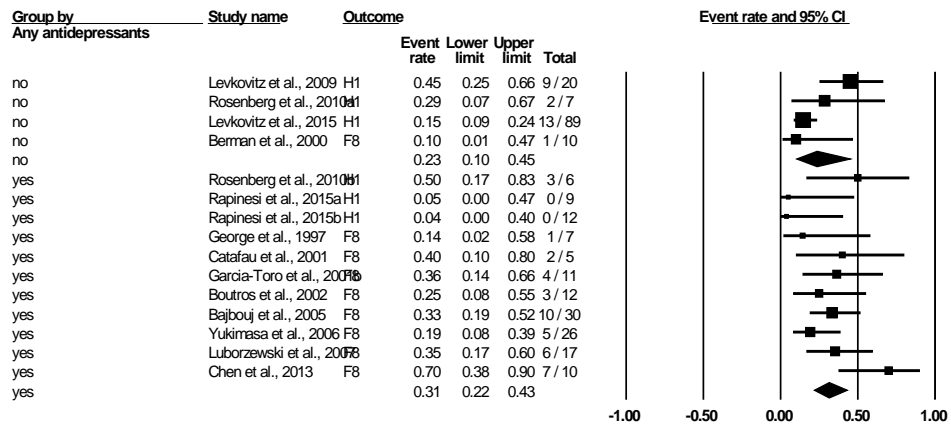

Note. Figures A-B are forest plots of mixed-effects meta-analyses comparing the antidepressant outcomes (response rates) based on the study designs (RCTs vs. open-label, Figure A) or the therapy type (add-on to antidepressants vs. monotherapy, Figure B) in studies with either coil (F8-coil and H1-coil).

Abbreviations: *CI*, 95% confidence interval; DTMS, deep transcranial magnetic stimulation; F8, figure-of-eight coil (rTMS); H1, H1-coil (DTMS); rTMS, repetitive transcranial magnetic stimulation; Total, sample size per study.

**Figure S5. Response rates: publication bias analysis**

**Classic fail-safe N**

|                                                               |           |
|---------------------------------------------------------------|-----------|
| Z-value for observed studies                                  | -5.95264  |
| P-value for observed studies                                  | 0.00000   |
| Alpha                                                         | 0.05000   |
| Tails                                                         | 2.00000   |
| Z for alpha                                                   | 1.95996   |
| Number of observed studies                                    | 15.00000  |
| Number of missing studies that would bring p-value to > alpha | 124.00000 |

**Orwin's fail-safe N**

|                                                             |          |
|-------------------------------------------------------------|----------|
| Event rate in observed studies                              | 0.27178  |
| Criterion for a 'trivial' event rate                        | 0.10000  |
| Mean event rate in missing studies                          | 0.05000  |
| Number missing studies needed to bring event rate under 0.1 | 25.00000 |

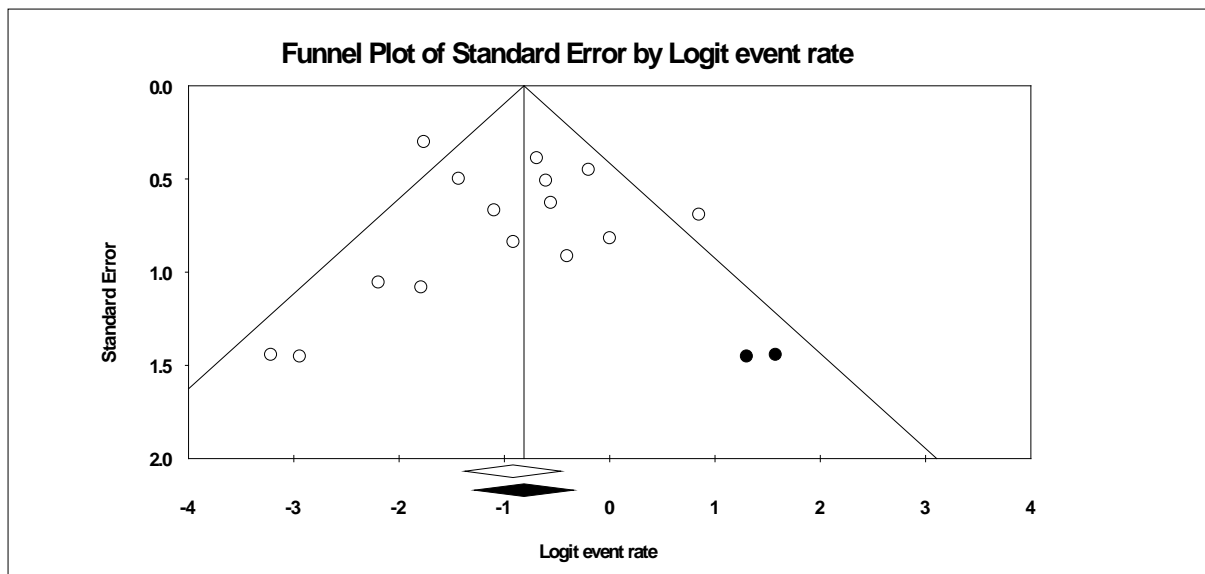

Note. The funnel plot shows a distribution of all effect sizes (the unfilled circles) around the pooled mean weighted effect of all studies (the unfilled diamond). Two studies theoretically missing from the analysis (the filled circles) are required to make the plot symmetric. The interpretation of the analysis including the missing studies (the filled diamond) is the same as without these studies (the unfilled diamond). If the missing studies indicate that publication bias occurred, such bias has no effect on the interpretation of the results of this analysis.

**Figure S6. Remission rates: subgroup analysis**

A. Study design (RCT vs. open-label)

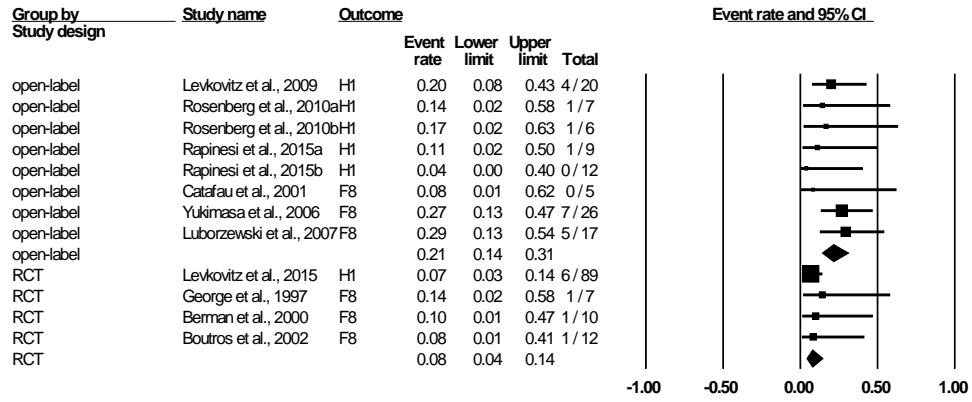

B. Therapy type (add-on to antidepressants vs. monotherapy)

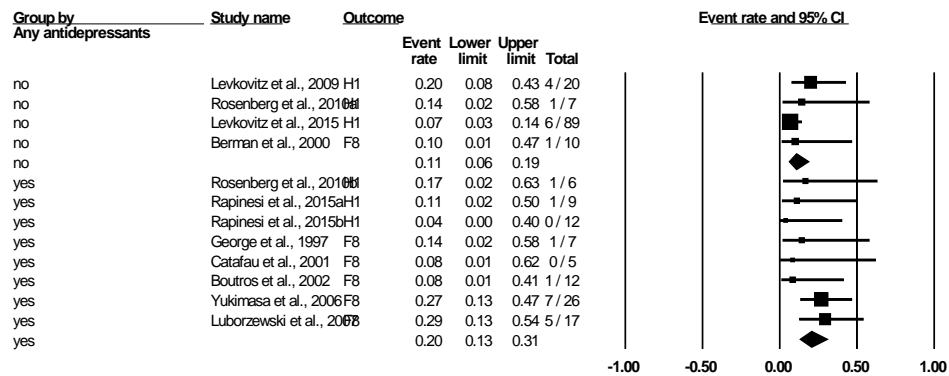

Note. Figures A-B are forest plots of mixed-effects meta-analyses comparing the antidepressant outcomes (remission rates) based on the study designs (RCTs vs. open-label, Figure A) or the therapy type (add-on to antidepressants vs. monotherapy, Figure B) in studies with either coil (F8-coil and H1-coil).

Abbreviations: *CI*, 95% confidence interval; DTMS, deep transcranial magnetic stimulation; F8, figure-of-eight coil (rTMS); H1, H1-coil (DTMS); rTMS, repetitive transcranial magnetic stimulation; Total, sample size per study.

**Figure S7. Remission rates: meta-regression analysis**

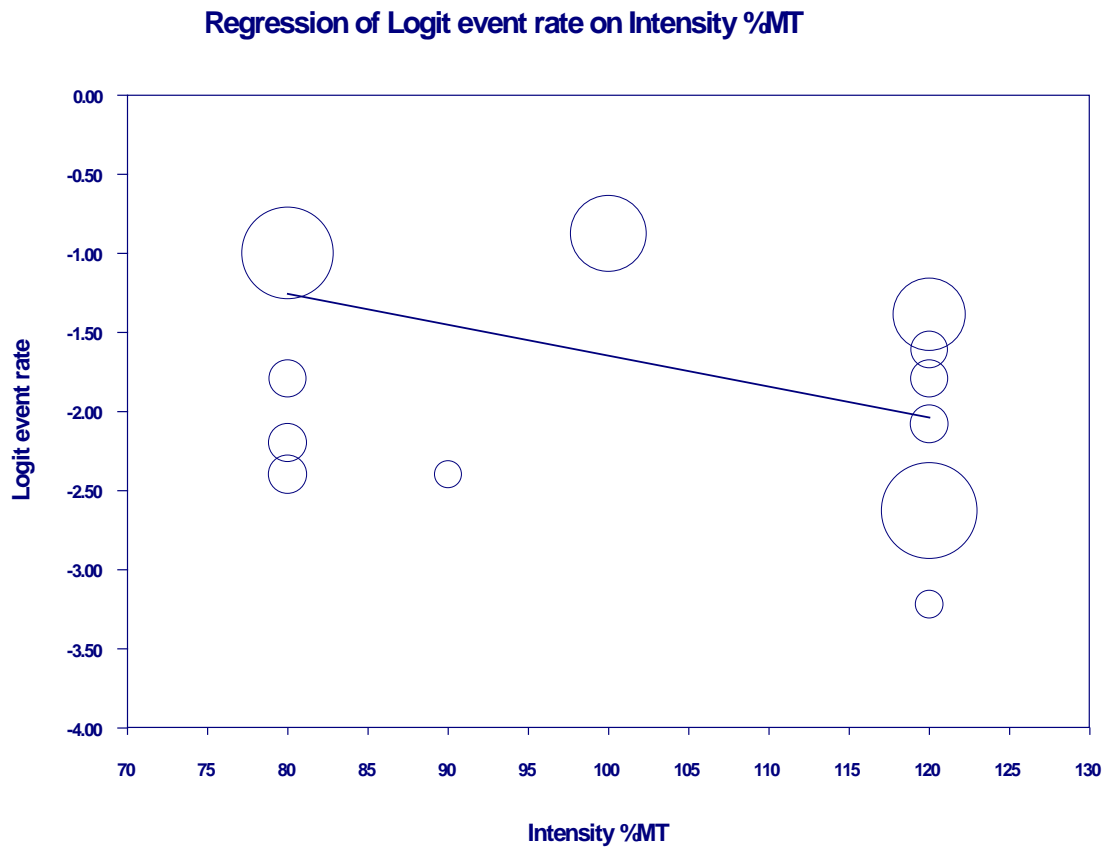

Note. The figure is a scatterplot of random-effects meta-regression. The plot shows the relationships between remission rates expressed as weighted effect size in each study (logit event rate depicted as circles- the larger the circle, the higher the study weight) on the Y-axis and predictor on the X-axis (stimulation intensity, %MT, per study) using data from studies with either coil (F8-coil and H1-coil).

Abbreviations: DTMS, deep transcranial magnetic stimulation; F8, figure-of-eight coil (rTMS); H1, H1-coil (DTMS); %MT, percent of the resting motor threshold; rTMS, repetitive transcranial magnetic stimulation.

**Figure S8. Remission rates: publication bias analysis**

**Classic fail-safe N**

|                                                               |           |
|---------------------------------------------------------------|-----------|
| Z-value for observed studies                                  | -7.96174  |
| P-value for observed studies                                  | 0.00000   |
| Alpha                                                         | 0.05000   |
| Tails                                                         | 2.00000   |
| Z for alpha                                                   | 1.95996   |
| Number of observed studies                                    | 12.00000  |
| Number of missing studies that would bring p-value to > alpha | 187.00000 |

**Orwin's fail-safe N**

|                                                             |         |
|-------------------------------------------------------------|---------|
| Event rate in observed studies                              | 0.15313 |
| Criterion for a 'trivial' event rate                        | 0.10000 |
| Mean event rate in missing studies                          | 0.05000 |
| Number missing studies needed to bring event rate under 0.1 | 8.00000 |

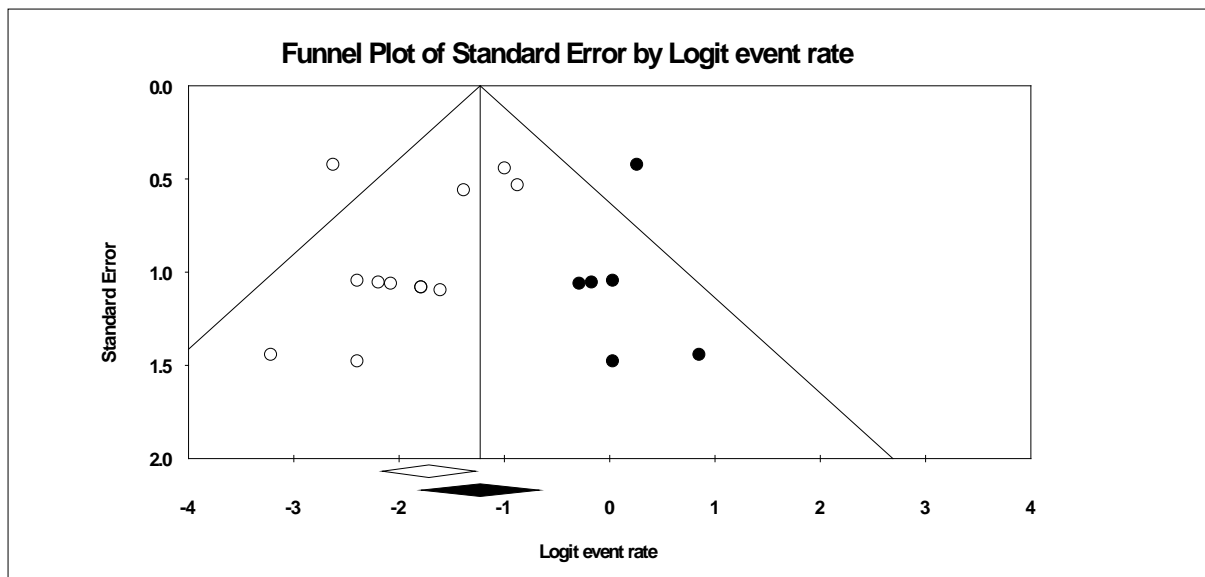

Note. The funnel plot shows a distribution of all effect sizes (the unfilled circles) around the pooled mean weighted effect of all studies (the unfilled diamond). Six studies theoretically missing from the analysis (the filled circles) are required to make the plot symmetric. The interpretation of the analysis including the missing studies (the filled diamond) is the same as without these studies (the unfilled diamond). If the missing studies indicate that publication bias occurred, such bias has no effect on the interpretation of the results of this analysis.

**Figure S9. Depression severity: subgroup analysis (H1-coil vs. F8-coil)**

A. Open-label studies

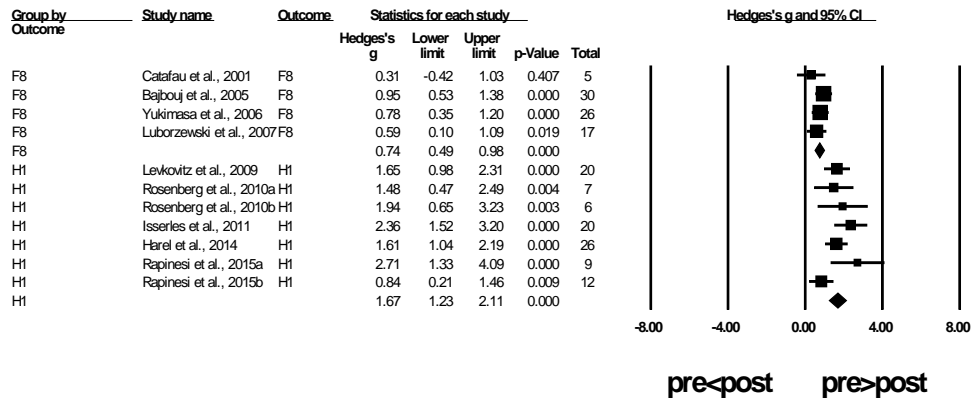

B. Add-on studies

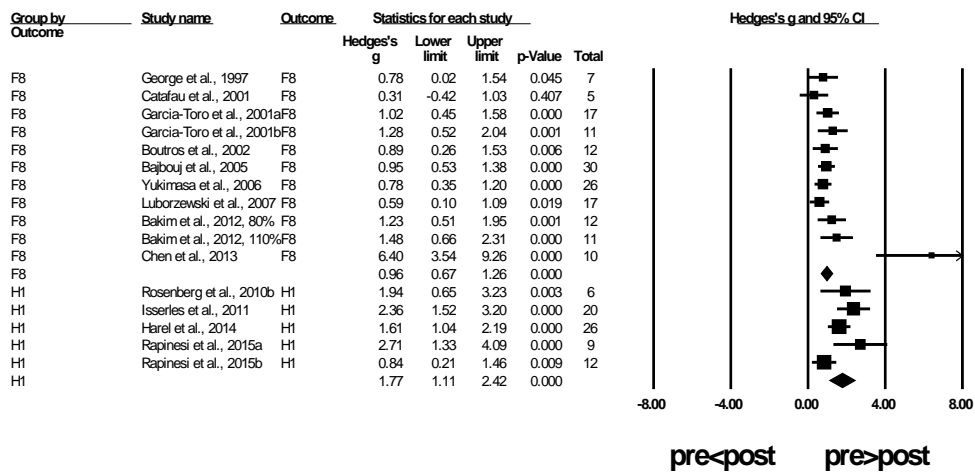

Note. Figures A-B are forest plots of mixed-effects meta-analyses comparing the antidepressant outcomes (depression severity) in studies with F8-coil vs. H1-coil (Figure A: open-label studies; Figure B: studies with patients on concurrent antidepressants).

Abbreviations: *CI*, 95% confidence interval; DTMS, deep transcranial magnetic stimulation; F8, figure-of-eight coil (rTMS); H1, H1-coil (DTMS); Hedges' *g* (effect size), standardised paired difference in means corrected for the sample size; rTMS, repetitive transcranial magnetic stimulation; Total, sample size per study.



**Figure S10. Response rates: subgroup analysis (H1-coil vs. F8-coil)**

A. Open-label studies

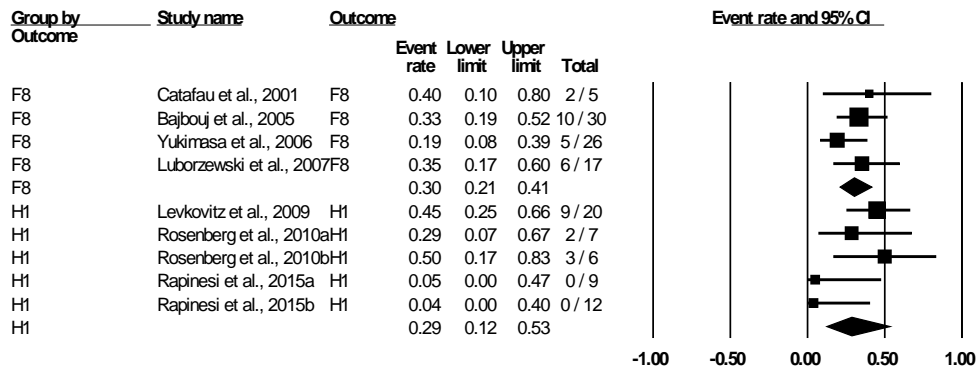

B. Add-on studies

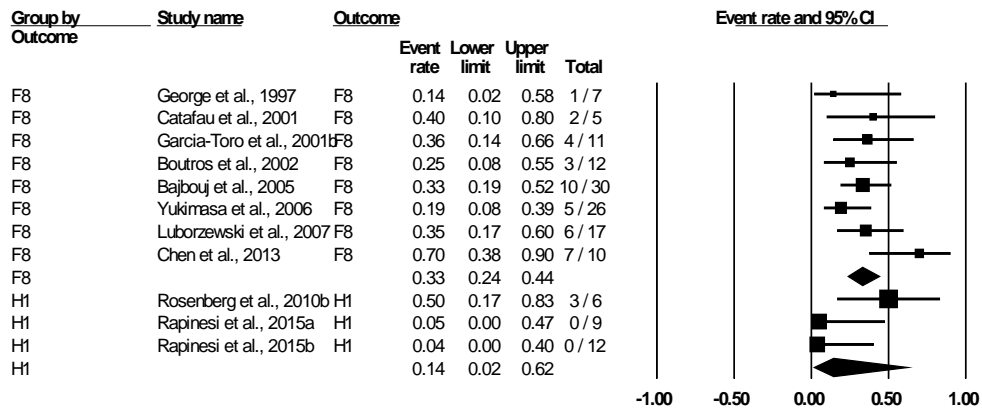

Note. Figures A-B are forest plots of mixed-effects meta-analyses comparing the antidepressant outcomes (response rates) in studies with F8-coil vs. H1-coil (Figure A: open-label studies; Figure B: studies with patients on concurrent antidepressants).

Abbreviations: *CI*, 95% confidence interval; DTMS, deep transcranial magnetic stimulation; F8, figure-of-eight coil (rTMS); H1, H1-coil (DTMS); rTMS, repetitive transcranial magnetic stimulation; Total, sample size per study.

**Figure S11. Remission rates: subgroup analysis (H1-coil vs. F8-coil)**

A. Open-label studies

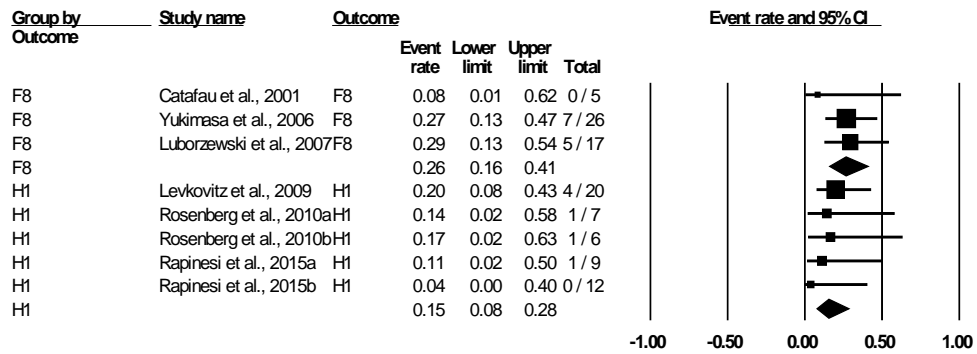

B. Add-on studies

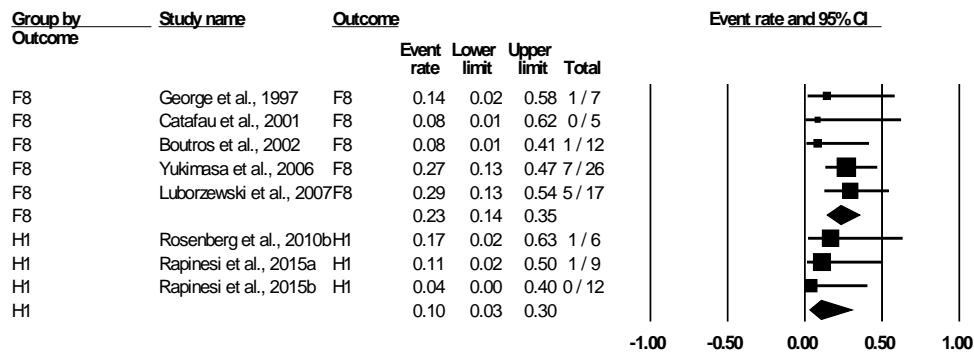

Note. Figures A-B are forest plots of mixed-effects meta-analyses comparing the antidepressant outcomes (remission rates) in studies with F8-coil vs. H1-coil (Figure A: open-label studies; Figure B: studies with patients on concurrent antidepressants).

Abbreviations: *CI*, 95% confidence interval; DTMS, deep transcranial magnetic stimulation; F8, figure-of-eight coil (rTMS); H1, H1-coil (DTMS); rTMS, repetitive transcranial magnetic stimulation; Total, sample size per study.

**Table S1. Risk of bias assessment**

| Study                          | Random sequence generation (selection bias) | Allocation concealment (selection bias) | Blinding of participants and personnel (performance bias) | Blinding of outcome assessment (detection bias) | Incomplete outcome data (attrition bias) | Selective reporting (reporting bias) | Other bias |
|--------------------------------|---------------------------------------------|-----------------------------------------|-----------------------------------------------------------|-------------------------------------------------|------------------------------------------|--------------------------------------|------------|
| <b>DTMS (H1-coil)</b>          |                                             |                                         |                                                           |                                                 |                                          |                                      |            |
| Levkovitz et al., 2009 [1]     | H                                           | H                                       | H                                                         | H                                               | L                                        | L                                    | L          |
| Rosenberg et al., 2010a [2]    | H                                           | H                                       | H                                                         | H                                               | L                                        | L                                    | L          |
| Rosenberg et al., 2010b [3]    | H                                           | H                                       | H                                                         | H                                               | L                                        | L                                    | L          |
| Isserles et al., 2011 [4]      | H                                           | H                                       | H                                                         | H                                               | U <sup>2</sup>                           | L                                    | L          |
| Harel et al., 2014 [5]         | H                                           | H                                       | H                                                         | H                                               | L                                        | L                                    | L          |
| Levkovitz et al., 2015 [6]     | L                                           | L                                       | L                                                         | L                                               | L                                        | L                                    | L          |
| Rapinesi et al., 2015a [7]     | H                                           | H                                       | H                                                         | H                                               | L                                        | L                                    | L          |
| Rapinesi et al., 2015b [8]     | H                                           | H                                       | H                                                         | H                                               | L                                        | L                                    | L          |
| <b>rTMS (F8-coil)</b>          |                                             |                                         |                                                           |                                                 |                                          |                                      |            |
| George et al., 1997 [9]        | U <sup>1</sup>                              | U <sup>1</sup>                          | L                                                         | L                                               | L                                        | L                                    | L          |
| Berman et al., 2000 [10]       | U <sup>1</sup>                              | U <sup>1</sup>                          | L                                                         | L                                               | L                                        | L                                    | L          |
| Catafau et al., 2001 [11]      | H                                           | H                                       | H                                                         | H                                               | L                                        | L                                    | L          |
| Garcia-Toro et al., 2001a [12] | U <sup>1</sup>                              | U <sup>1</sup>                          | L                                                         | L                                               | U <sup>2</sup>                           | L                                    | L          |
| Garcia-Toro et al., 2001b [13] | U <sup>1</sup>                              | U <sup>1</sup>                          | L                                                         | L                                               | U <sup>2</sup>                           | L                                    | L          |
| Boutros et al., 2002 [14]      | L                                           | L                                       | L                                                         | L                                               | L                                        | L                                    | L          |
| Bajbouj et al., 2005 [15]      | H                                           | H                                       | H                                                         | H                                               | L                                        | L                                    | L          |
| Yukimasa et al., 2006 [16]     | H                                           | H                                       | H                                                         | H                                               | L                                        | L                                    | L          |
| Luborzewski et al., 2007 [17]  | H                                           | H                                       | H                                                         | H                                               | L                                        | L                                    | L          |
| Bakim et al., 2012a [18]       | L                                           | L                                       | L                                                         | L                                               | L                                        | L                                    | L          |
| Chen et al., 2013 [19]         | U <sup>1</sup>                              | U <sup>1</sup>                          | L                                                         | L                                               | L                                        | L                                    | L          |

Note. Coding criteria:

- U<sup>1</sup> indicates that the random sequence generation and/or the allocation concealment were not described in the double-blind randomised controlled-trials with inactive sham groups (both risks are likely to be low)
- U<sup>2</sup> indicates that studies reported outcomes for completers only meaning that the risk of attrition bias is unclear

## References

- [1] Levkovitz, Y, Harel, EV, Roth, Y, Braw, Y, Most, D, Katz, LN, Sheer, A, Gersner, R, Zangen, A. Deep transcranial magnetic stimulation over the prefrontal cortex: evaluation of antidepressant and cognitive effects in depressive patients. *Brain Stimul.* 2009;2:188-200.
- [2] Rosenberg, O, Shoenfeld, N, Zangen, A, Kotler, M, Dannon, PN. Deep TMS in a resistant major depressive disorder: a brief report. *Depress Anxiety.* 2010a;27:465-469.
- [3] Rosenberg, O, Zangen, A, Stryker, R, Kotler, M, Dannon, PN. Response to deep TMS in depressive patients with previous electroconvulsive treatment. *Brain Stimul.* 2010b;3:211-217.
- [4] Isserles, M, Rosenberg, O, Dannon, P, Levkovitz, Y, Kotler, M, Deutsch, F, Lerer, B, Zangen, A. Cognitive-emotional reactivation during deep transcranial magnetic stimulation over the prefrontal cortex of depressive patients affects antidepressant outcome. *J Affect Disord.* 2011;128:235-242.
- [5] Harel, EV, Rabany, L, Deutsch, L, Bloch, Y, Zangen, A, Levkovitz, Y. H-coil repetitive transcranial magnetic stimulation for treatment resistant major depressive disorder: an 18-week continuation safety and feasibility study. *World J Biol Psychiatry.* 2014;15:298-306.
- [6] Levkovitz, Y, Isserles, M, Padberg, F, Lisanby, SH, Bystritsky, A, Xia, G, Tendler, A, Daskalakis, ZJ, Winston, JL, Dannon, P, Hafez, HM, Reti, IM, Morales, OG, Schlaepfer, TE, Hollander, E, Berman, JA, Husain, MM, Sofer, U, Stein, A, Adler, S, Deutsch, L, Deutsch, F, Roth, Y, George, MS, Zangen, A. Efficacy and safety of deep transcranial magnetic stimulation for major depression: a prospective multicenter randomized controlled trial. *World Psychiatry.* 2015;14:64-73.
- [7] Rapinesi, C, Bersani, F, Kotzalidis, G, Imperatori, C, Del Casale, A, Di Pietro, S, Ferri, V, Serata, D, Raccach, R, Zangen, A, Angeletti, G, Girardi, P. Maintenance deep transcranial magnetic stimulation sessions is associated with reduced depressive relapses in patients with unipolar or bipolar depression. *Front Neurol.* 2015a;6:16.
- [8] Rapinesi, C, Curto, M, Kotzalidis, GD, Del Casale, A, Serata, D, Ferri, VR, Di Pietro, S, Scatena, P, Bersani, FS, Raccach, RN, Digiacomantonio, V, Ferracuti, S, Bersani, G, Zangen, A, Angeletti, G, Girardi, P. Antidepressant effectiveness of deep transcranial magnetic stimulation (dTMS) in patients with major depressive disorder (MDD) with or without alcohol use disorders (AUDs): a 6-month, open label, follow-up study. *J Affect Disord.* 2015b;174:57-63.
- [9] George, M, Wassermann, EM, Williams, WE, Kimbrell, TA, Little, JT, Hallett, M, Post, RM. Mood improvement following daily left prefrontal repetitive transcranial magnetic stimulation in patients with depression: A placebo-controlled crossover trial. *Am J Psychiatry.* 1997;154:1752-1756.
- [10] Berman, RM, Narasimhan, M, Sanacora, G, Miano, AP, Hoffman, RE, Hu, XS, Charney, DS, Boutros, NN. A randomized clinical trial of repetitive transcranial magnetic stimulation in the treatment of major depression. *Biol Psychiatry.* 2000;47:332-337.
- [11] Catafau, AM, Perez, V, Gironell, A, Martin, JC, Kulisevsky, J, Estorch, M, Carrió, I, Alvarez, E. SPECT mapping of cerebral activity changes induced by repetitive transcranial magnetic stimulation in depressed patients: A pilot study. *Psychiatry Res Neuroimaging.* 2001;106:151-160.
- [12] Garcia-Toro, M, Mayol, A, Arnillas, H, Capllonch, I, Ibarra, O, Crespí, M, Micó, J, Lafau, O, Lafuente, L. Modest adjunctive benefit with transcranial magnetic stimulation in medication-resistant depression. *J Affect Disord.* 2001a;64:271-275.

- [13] García-Toro, M, Pascual-Leone, A, Romera, M, González, A, Micó, J, Ibarra, O, Arnillas, H, Capllonch, I, Mayol, A, Tormos, JM. Prefrontal repetitive transcranial magnetic stimulation as add on treatment for depression. *J Neurol Neurosurg Psychiatry*. 2001b;71:546-548.
- [14] Boutros, NN, Gueorguieva, R, Hoffman, RE, Oren, DA, Feingold, A, Berman, RM. Lack of a therapeutic effect of a 2-week sub-threshold transcranial magnetic stimulation course for treatment-resistant depression. *Psychiatry Res*. 2002;113:245-254.
- [15] Bajbouj, M, Brakemeier, E-L, Schubert, F, Lang, UE, Neu, P, Schindowski, C, Danker-Hopfe, H. Repetitive transcranial magnetic stimulation of the dorsolateral prefrontal cortex and cortical excitability in patients with major depressive disorder. *Exp Neurol*. 2005;196:332-338.
- [16] Yukimasa, T, Yoshimura, R, Tamagawa, A, Uozumi, T, Shinkai, K, Ueda, N, Tsuji, S, Nakamura, J. High-frequency repetitive transcranial magnetic stimulation improves refractory depression by influencing catecholamine and brain-derived neurotrophic factors. *Pharmacopsychiatry*. 2006;39:52-59.
- [17] Luborzewski, A, Schubert, F, Seifert, F, Danker-Hopfe, H, Brakemeier, E-L, Schlattmann, P, Anghelescu, I, Colla, M, Bajbouj, M. Metabolic alterations in the dorsolateral prefrontal cortex after treatment with high-frequency repetitive transcranial magnetic stimulation in patients with unipolar major depression. *J Psychiatr Res*. 2007;41:606-615.
- [18] Bakim, B, Uzun, UE, Karamustafalioglu, O, Ozcelik, B, Alpak, G, Tankaya, O, Cengiz, Y, Yavuz, BG. The combination of antidepressant drug therapy and high-frequency repetitive transcranial magnetic stimulation in medication-resistant depression. *Klin Psikofarmakol B*. 2012;22:244-253.
- [19] Chen, S-J, Chang, C-H, Tsai, H-C, Chen, S-T, Lin, CC. Superior antidepressant effect occurring 1 month after rTMS: add-on rTMS for subjects with medication-resistant depression. *Neuropsychiatr Dis Treat*. 2013;9:397-401.
